# Supplementary material for: Assessment of Additional Medical Costs Among Older Adults in Japan With a History of Childhood Maltreatment
Source: PubMed Central journal article supplement (PMC6991253; doi:10.1001/jamanetworkopen.2019.18681), 2020-01-08
Supplement: jamanetwopen-e1918681-s001.pdf [file jamanetwopen-e1918681-s001.pdf]

## Supplementary Online Content

Isumi A, Fujiwara T, Kato H, et al. Assessment of additional medical costs among older adults in Japan with a history of childhood maltreatment. *JAMA Netw Open*. 2020;3(1):e1918681. doi:10.1001/jamanetworkopen.2019.18681

**eFigure.** Histogram of Mean Annual Medical Costs

**eTable 1.** Health-Related Behaviors and Health Conditions Associated With Each Type of Childhood Maltreatment

**eTable 2.** Comparison of Characteristics and Prevalence of Childhood Maltreatment Depending on Availability of Medical Cost Data

This supplementary material has been provided by the authors to give readers additional information about their work.

**eFigure.** Histogram of Mean Annual Medical Costs

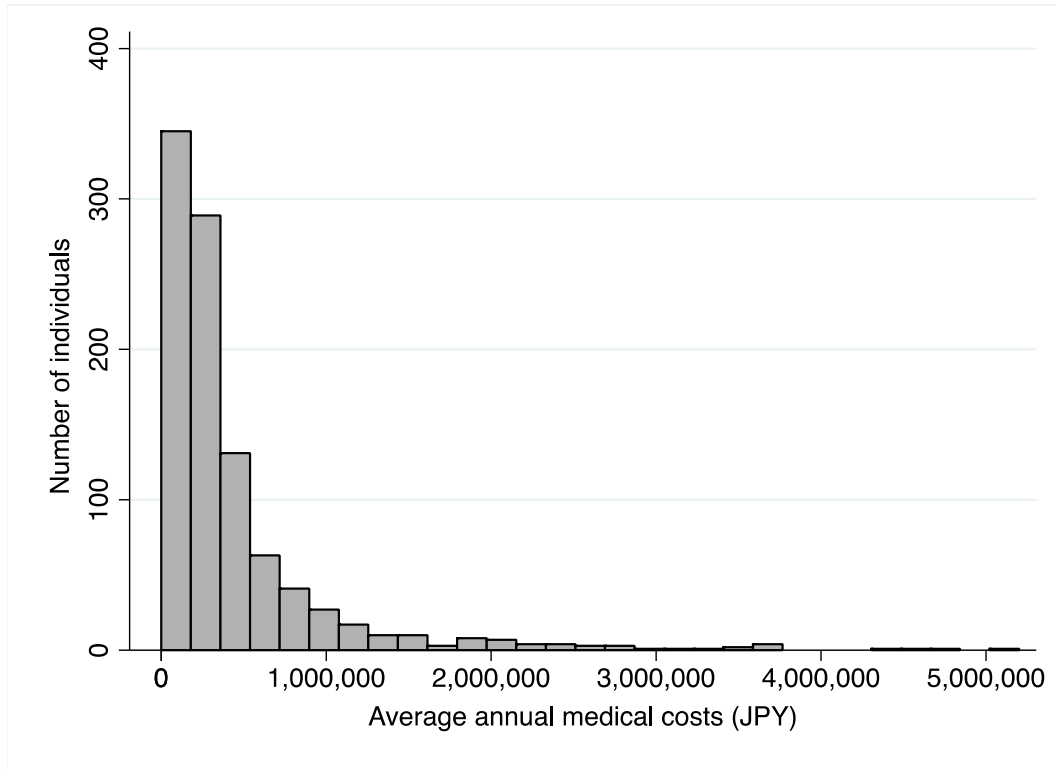

**eTable 1.** Health-Related Behaviors and Health Conditions Associated With Each Type of Childhood Maltreatment

|                     |               | Witness of IPV |      |               |      |          | Physical abuse |      |               |      |          | Emotional neglect |      |                |      |          | Emotional abuse |      |               |      |          |
|---------------------|---------------|----------------|------|---------------|------|----------|----------------|------|---------------|------|----------|-------------------|------|----------------|------|----------|-----------------|------|---------------|------|----------|
|                     |               | No<br>(N=926)  |      | Yes<br>(N=44) |      |          | No<br>(N=948)  |      | Yes<br>(N=19) |      |          | No<br>(N=858)     |      | Yes<br>(N=104) |      |          | No<br>(N=908)   |      | Yes<br>(N=56) |      |          |
| Health conditions   |               | N              | %    | N             | %    | <i>p</i> | N              | %    | N             | %    | <i>p</i> | N                 | %    | N              | %    | <i>p</i> | N               | %    | N             | %    | <i>p</i> |
| Self-rated health   | Excellent     | 115            | 12.8 | 3             | 7.0  | 0.191    | 118            | 12.9 | 0             | 0    | 0.011    | 117               | 14.1 | 3              | 3.0  | <0.001   | 114             | 13   | 4             | 7.4  | 0.620    |
|                     | Good          | 652            | 72.7 | 30            | 69.8 |          | 668            | 72.8 | 12            | 63.2 |          | 605               | 72.8 | 68             | 67.3 |          | 637             | 72.4 | 40            | 74.1 |          |
|                     | Fair          | 117            | 13.0 | 8             | 18.6 |          | 117            | 12.7 | 7             | 36.8 |          | 96                | 11.6 | 28             | 27.7 |          | 115             | 13.1 | 9             | 16.7 |          |
|                     | Poor          | 13             | 1.4  | 2             | 4.7  |          | 15             | 1.6  | 0             | 0    |          | 13                | 1.6  | 2              | 2.0  |          | 14              | 1.6  | 1             | 1.9  |          |
| Smoking             | Yes           | 103            | 11.2 | 4             | 9.1  | 0.845    | 104            | 11.1 | 3             | 15.8 | 0.274    | 88                | 10.3 | 17             | 16.5 | 0.002    | 100             | 11.1 | 7             | 12.7 | 0.836    |
|                     | Used to smoke | 141            | 15.4 | 6             | 13.6 |          | 141            | 15.0 | 5             | 26.3 |          | 120               | 14.1 | 25             | 24.3 |          | 138             | 15.3 | 7             | 12.7 |          |
|                     | No            | 674            | 73.4 | 34            | 77.3 |          | 695            | 73.9 | 11            | 57.9 |          | 643               | 75.6 | 61             | 59.2 |          | 663             | 73.6 | 41            | 74.5 |          |
| Alcohol             | Yes           | 374            | 40.7 | 17            | 38.6 | 0.416    | 380            | 40.4 | 11            | 57.9 | 0.101    | 343               | 40.4 | 44             | 42.7 | 0.888    | 366             | 40.6 | 22            | 40.7 | 0.963    |
|                     | Used to drink | 43             | 4.7  | 4             | 9.1  |          | 44             | 4.7  | 2             | 10.5 |          | 40                | 4.7  | 5              | 4.9  |          | 43              | 4.8  | 3             | 5.6  |          |
|                     | No            | 501            | 54.6 | 23            | 52.3 |          | 516            | 54.9 | 6             | 31.6 |          | 467               | 54.9 | 54             | 52.4 |          | 493             | 54.7 | 29            | 53.7 |          |
| Diseases history    |               |                |      |               |      |          |                |      |               |      |          |                   |      |                |      |          |                 |      |               |      |          |
| High blood pressure | Yes           | 346            | 37.4 | 13            | 29.5 | 0.294    | 350            | 36.9 | 8             | 42.1 | 0.643    | 318               | 37.1 | 38             | 36.5 | 0.917    | 336             | 37   | 21            | 37.5 | 0.941    |
| Stroke              | Yes           | 28             | 3.0  | 2             | 4.5  | 0.569    | 27             | 2.8  | 3             | 15.8 | 0.001    | 25                | 2.9  | 5              | 4.8  | 0.294    | 27              | 3    | 3             | 5.4  | 0.319    |
| Heart disease       | Yes           | 77             | 8.3  | 3             | 6.8  | 0.724    | 77             | 8.1  | 2             | 10.5 | 0.705    | 72                | 8.4  | 8              | 7.7  | 0.807    | 76              | 8.4  | 4             | 7.1  | 0.747    |

|                                                 |     |     |      |    |      |       |     |      |   |      |       |     |      |    |      |       |     |      |    |      |       |
|-------------------------------------------------|-----|-----|------|----|------|-------|-----|------|---|------|-------|-----|------|----|------|-------|-----|------|----|------|-------|
| Diabetes                                        | Yes | 115 | 12.4 | 5  | 11.4 | 0.835 | 117 | 12.3 | 2 | 10.5 | 0.811 | 103 | 12.0 | 17 | 16.3 | 0.205 | 107 | 11.8 | 12 | 21.4 | 0.033 |
| Hyperlipidemia (lipid abnormality)              | Yes | 136 | 14.7 | 9  | 20.5 | 0.294 | 140 | 14.8 | 4 | 21.1 | 0.446 | 127 | 14.8 | 15 | 14.4 | 0.918 | 137 | 15.1 | 7  | 12.5 | 0.598 |
| Respiratory disease                             | Yes | 37  | 4.0  | 4  | 9.1  | 0.101 | 38  | 4.0  | 2 | 10.5 | 0.158 | 38  | 4.4  | 4  | 3.8  | 0.784 | 41  | 4.5  | 0  | 0    | 0.104 |
| Gastrointestinal, liver, or gallbladder disease | Yes | 74  | 8.0  | 3  | 6.8  | 0.779 | 75  | 7.9  | 1 | 5.3  | 0.671 | 66  | 7.7  | 10 | 9.6  | 0.492 | 70  | 7.7  | 6  | 10.7 | 0.418 |
| Kidney or prostate gland disease                | Yes | 53  | 5.7  | 4  | 9.1  | 0.353 | 54  | 5.7  | 2 | 10.5 | 0.372 | 43  | 5.0  | 11 | 10.6 | 0.020 | 51  | 5.6  | 5  | 8.9  | 0.304 |
| Musculoskeletal disease                         | Yes | 88  | 9.5  | 10 | 22.7 | 0.004 | 96  | 10.1 | 2 | 10.5 | 0.954 | 83  | 9.7  | 13 | 12.5 | 0.364 | 92  | 10.1 | 5  | 8.9  | 0.771 |
| Traumatic injury                                | Yes | 17  | 1.8  | 2  | 4.5  | 0.205 | 19  | 2.0  | 0 | 0    | 0.533 | 18  | 2.1  | 0  | 0    | 0.136 | 18  | 2    | 0  | 0    | 0.288 |
| Cancer                                          | Yes | 39  | 4.2  | 5  | 11.4 | 0.026 | 40  | 4.2  | 3 | 15.8 | 0.015 | 37  | 4.3  | 4  | 3.8  | 0.824 | 39  | 4.3  | 4  | 7.1  | 0.316 |
| Blood or immune system disease                  | Yes | 14  | 1.5  | 0  | 0    | 0.411 | 14  | 1.5  | 0 | 0    | 0.594 | 13  | 1.5  | 1  | 1.0  | 0.656 | 13  | 1.4  | 1  | 1.8  | 0.830 |
| Depression                                      | Yes | 10  | 1.1  | 0  | 0    | 0.488 | 10  | 1.1  | 0 | 0    | 0.653 | 7   | 0.8  | 3  | 2.9  | 0.049 | 10  | 1.1  | 0  | 0    | 0.430 |
| Dementia                                        | Yes | 6   | 0.6  | 0  | 0    | 0.592 | 6   | 0.6  | 0 | 0    | 0.728 | 5   | 0.6  | 1  | 1.0  | 0.643 | 6   | 0.7  | 0  | 0    | 0.542 |
| Parkinson's disease                             | Yes | 3   | 0.3  | 0  | 0    | 0.705 | 3   | 0.3  | 0 | 0    | 0.806 | 3   | 0.3  | 0  | 0    | 0.546 | 3   | 0.3  | 0  | 0    | 0.667 |
| Eye disease                                     | Yes | 159 | 17.2 | 10 | 22.7 | 0.342 | 161 | 17.0 | 6 | 31.6 | 0.096 | 148 | 17.2 | 19 | 18.3 | 0.795 | 150 | 16.5 | 16 | 28.6 | 0.020 |
| Ear disease                                     | Yes | 47  | 5.1  | 3  | 6.8  | 0.610 | 49  | 5.2  | 1 | 5.3  | 0.985 | 43  | 5.0  | 6  | 5.8  | 0.740 | 45  | 5    | 5  | 8.9  | 0.193 |
| Other diseases                                  | Yes | 84  | 9.1  | 2  | 4.5  | 0.302 | 83  | 8.8  | 3 | 15.8 | 0.286 | 72  | 8.4  | 12 | 11.5 | 0.283 | 77  | 8.5  | 8  | 14.3 | 0.137 |

**eTable 2.** Comparison of Characteristics and Prevalence of Childhood Maltreatment Depending on Availability of Medical Cost Data

|                               |                        | FY2012/2013 Medical cost data |         |                        |         |          |
|-------------------------------|------------------------|-------------------------------|---------|------------------------|---------|----------|
|                               |                        | Not available<br>(N=2,102)    |         | Available<br>(N=5,155) |         |          |
| Characteristics of the sample |                        | N or Mean                     | % or SD | N or Mean              | % or SD | <i>p</i> |
| Age                           | 65-75                  | 69.0                          | 3.2     | 70.5                   | 2.9     | <0.001   |
| Sex                           | Men                    | 1055                          | 50.2    | 2237                   | 43.4    | <0.001   |
|                               | Women                  | 963                           | 45.8    | 2842                   | 55.1    |          |
|                               | Missing                | 84                            | 4.0     | 76                     | 1.5     |          |
| Education                     | < 6 years              | 28                            | 1.3     | 20                     | 0.4     | <0.001   |
|                               | 6-9 years              | 518                           | 24.6    | 1207                   | 23.4    |          |
|                               | 10-12 years            | 784                           | 37.3    | 2292                   | 44.5    |          |
|                               | ≥13 years              | 668                           | 31.8    | 1526                   | 29.6    |          |
|                               | Others                 | 12                            | 0.6     | 21                     | 0.4     |          |
|                               | Missing                | 92                            | 4.4     | 89                     | 1.7     |          |
| Employment                    | Working                | 788                           | 37.5    | 1011                   | 19.6    | <0.001   |
|                               | Retired                | 943                           | 44.9    | 3268                   | 63.4    |          |
|                               | Never employed         | 175                           | 8.3     | 542                    | 10.5    |          |
|                               | Missing                | 196                           | 9.3     | 334                    | 6.5     |          |
| Occupation (Longest)          | Specialist, technician | 372                           | 17.7    | 881                    | 17.1    | <0.001   |

|                         |                                    |      |      |      |      |        |
|-------------------------|------------------------------------|------|------|------|------|--------|
|                         | Manager                            | 213  | 10.1 | 345  | 6.7  |        |
|                         | Clerical worker                    | 346  | 16.5 | 1075 | 20.9 |        |
|                         | Sales/service jobs                 | 391  | 18.6 | 1049 | 20.3 |        |
|                         | Manual labor                       | 202  | 9.6  | 466  | 9.0  |        |
|                         | Agriculture, forestry or fisheries | 7    | 0.3  | 39   | 0.8  |        |
|                         | Self-employed                      | 76   | 3.6  | 151  | 2.9  |        |
|                         | Other                              | 184  | 8.8  | 401  | 7.8  |        |
|                         | Never had a job                    | 64   | 3.0  | 228  | 4.4  |        |
|                         | Missing                            | 247  | 11.8 | 520  | 10.1 |        |
| Marital status          | Married                            | 1380 | 65.7 | 3826 | 74.2 | <0.001 |
|                         | Divorced                           | 282  | 13.4 | 717  | 13.9 |        |
|                         | Widowed                            | 191  | 9.1  | 237  | 4.6  |        |
|                         | Never married                      | 119  | 5.7  | 234  | 4.5  |        |
|                         | Other                              | 38   | 1.8  | 45   | 0.9  |        |
|                         | Missing                            | 92   | 4.4  | 96   | 1.9  |        |
| Annual household income | <1.5 million                       | 350  | 16.7 | 783  | 15.2 | <0.001 |
|                         | 1.5–2.9 million                    | 477  | 22.7 | 1907 | 37.0 |        |
|                         | 3.0–4.9 million                    | 478  | 22.7 | 1284 | 24.9 |        |
|                         | ≥5.0 million                       | 488  | 23.2 | 658  | 12.8 |        |
|                         | Missing                            | 309  | 14.7 | 523  | 10.1 |        |
| Living status           | Living alone                       | 457  | 21.7 | 842  | 16.3 | <0.001 |
|                         | Living with family                 | 1494 | 71.1 | 3999 | 77.6 |        |

|                                             |         |     |      |     |      |       |
|---------------------------------------------|---------|-----|------|-----|------|-------|
|                                             | Other   | 31  | 1.5  | 67  | 1.3  |       |
|                                             | Missing | 120 | 5.7  | 247 | 4.8  |       |
| <b>Prevalence of childhood maltreatment</b> |         |     |      |     |      |       |
| Witnessing DV                               | No      | 384 | 93.2 | 926 | 94.7 | 0.189 |
|                                             | Yes     | 20  | 4.9  | 44  | 4.5  |       |
|                                             | Missing | 8   | 1.9  | 8   | 0.8  |       |
| Physical abuse                              | No      | 395 | 95.9 | 948 | 96.9 | 0.465 |
|                                             | Yes     | 9   | 2.2  | 19  | 1.9  |       |
|                                             | Missing | 8   | 1.9  | 11  | 1.1  |       |
| Emotional neglect                           | No      | 361 | 87.6 | 858 | 87.7 | 0.184 |
|                                             | Yes     | 49  | 11.9 | 104 | 10.6 |       |
|                                             | Missing | 2   | 0.5  | 16  | 1.6  |       |
| Emotional abuse                             | No      | 378 | 91.7 | 908 | 92.8 | 0.711 |
|                                             | Yes     | 26  | 6.3  | 56  | 5.7  |       |
|                                             | Missing | 8   | 1.9  | 14  | 1.4  |       |
